# Supplementary material for: Inferring Condition-Specific Modulation of Transcription Factor Activity in Yeast through Regulon-Based Analysis of Genomewide Expression
Source: PLoS One. 2008 Sep 3;3(9):e3112. doi: 10.1371/journal.pone.0003112 (PMC2518834; doi:10.1371/journal.pone.0003112)

## Expression Data

(936 conditions)

### Motif-based Regulons

Database of 124 hand-curated Motifs. A gene belongs to the regulon if the motif matches the 600 bp upstream region

### ChIP-based Regulons

ChIP-chip data Harbison *et al.* (2004). A gene belongs to the regulon if the p-value for TF binding is smaller than 0.001

### RegulonProfiler

Use t-test to score differential expression of all regulons containing >6 genes; the highest and lowest expression value are discarded

### RegulonProfilerDB

(database of regulon profiles)

### Co-Modulation analysis

Compute Pearson correlation between regulon profiles of two different TFs

| regulonProfiler                        |                |            |        |                   |
|----------------------------------------|----------------|------------|--------|-------------------|
|                                        |                |            |        |                   |
| Experiment                             | Author         | Conditions | PubMed | Supplemental data |
| C-S-P-N chemostat limitation           | Boer           | 6          | PUBMED | data              |
| Cell wall perturbant                   | Boorsma        | 2          | PUBMED | data              |
| Lithium response                       | Bro            | 4          | PUBMED | data              |
| Sporulation                            | Chu            | 9          | PUBMED | data              |
| Carbon-limited chemostats              | Daran-Lapujade | 6          | PUBMED | data              |
| regulation by PDR1                     | Devaux         | 11         | PUBMED | data              |
| Compounds and stress                   | Egenomix       | 20         | PUBMED | data              |
| Proteasome inhibitor                   | Flerning       | 30         | PUBMED | data              |
| Environmental stress                   | Gasch          | 180        | PUBMED | data              |
| Map kinase                             | Harris         | 22         | PUBMED | data              |
| Rosetta - gene deletions and compounds | Hughes         | 300        | PUBMED | data              |
| Cell wall mutants                      | Lagorce        | 5          | PUBMED | data              |
| TCA cycle mutants                      | McCammon       | 16         | PUBMED | data              |
| Titrateable promoter alleles           | Mnaimneh       | 215        | PUBMED | data              |
| Cold shift                             | Sahara         | 5          | PUBMED | data              |
| Cell Cycle                             | Spellman       | 77         | PUBMED | data              |
| Anearobic N-C-P-S chemostats           | Tai            | 4          | PUBMED | data              |
| Calcineurin                            | Yoshimoto      | 24         | PUBMED | data              |

Search Experiment name Go

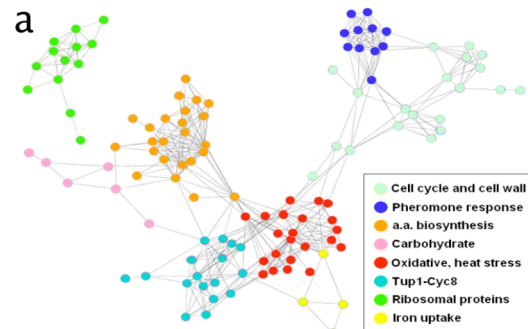

Supplement: Figure S1 — Schematic overview of RegulonProfilerDB. (0.30 MB PDF) [file pone.0003112.s001.pdf]
